# Supplementary material for: Multifunctional iron oxide–carbon hybrid microrods
Source: Royal Society of Chemistry journal article supplement (doi:10.1039/c6ra19489c), 2016-01-01
Supplement: c6ra19489c1.pdf [file c6ra19489c1.pdf]

## Supporting Information

# Multifunctional Iron Oxide – Carbon Hybrid Microrods

Lu Zhu <sup>a\*</sup>, Weijie Huang <sup>b</sup>, Zachary S. Rinehart <sup>a</sup>, Jason Tam <sup>c</sup> and Yiping Zhao <sup>b</sup>

<sup>a</sup> *College of Engineering, University of Georgia, Athens, GA 30602, USA*

<sup>b</sup> *Department of Physics and Astronomy, University of Georgia, Athens, GA 30602, USA*

<sup>c</sup> *cDepartment of Materials Science and Engineering, University of Toronto, Toronto, ON M5S  
3E4, Canada.*

### S1. Control synthesis.

0.7575 g  $\text{Fe}(\text{NO}_3)_3 \cdot 9\text{H}_2\text{O}$  was thoroughly dissolved into 75 ml EG. Then the solution was transferred into a 100 ml Teflon-lined stainless steel autoclave and maintained at a temperature of 220 °C for 12 h. The black product was then washed twice with ethanol.

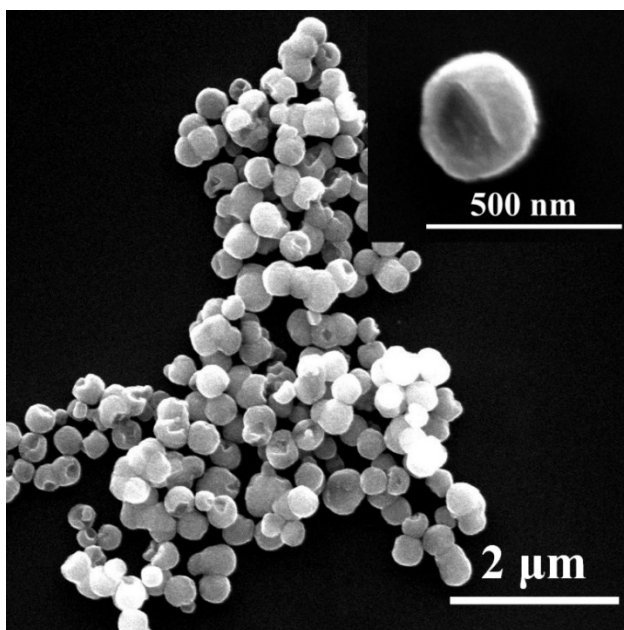

**Figure S1.** SEM image of the product synthesized without glucose.

### S2. MB and MO solution concentrations: Calibration curve.

The calibration curves shown below were used to compute the concentrations of MB and MO solutions through UV-Vis absorbance spectra. The absorbance of MB solution at  $\lambda_{\text{max}} = 644$  nm and absorbance of MO solution at  $\lambda_{\text{max}} = 466$  nm were used to estimate the concentrations of solutions from their calibration curves.

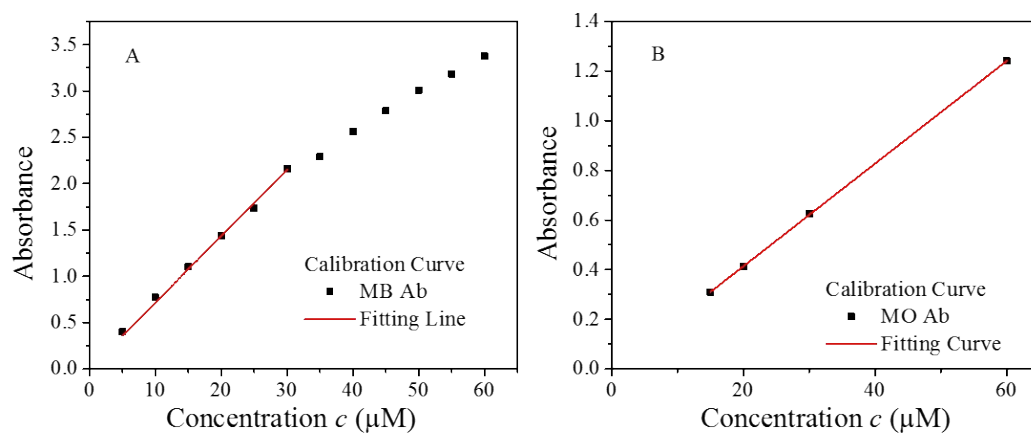

**Figure S2.** Concentration calibration curves of MB (A) and MO (B) solutions.

### S3. Set-up of clot lysis experiments.

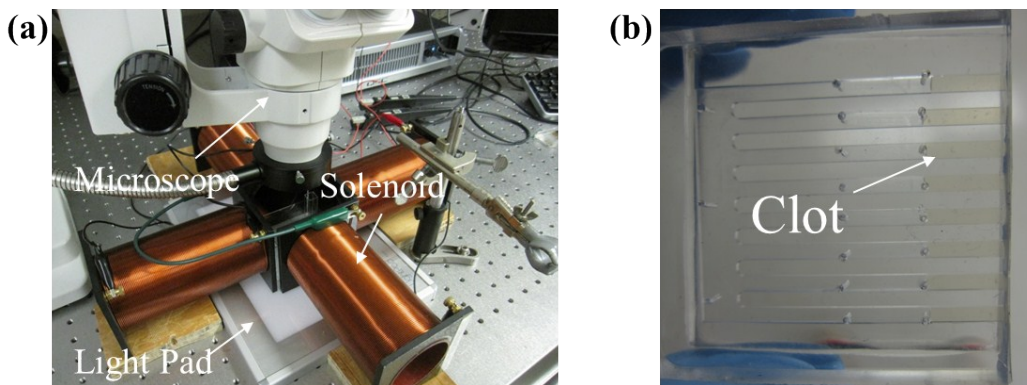

**Figure S3.** Experimental set-up of magnetic field (a) and PDMS channels with blood clots (b).

### S4. Dye Absorption capability of different micro-rods.

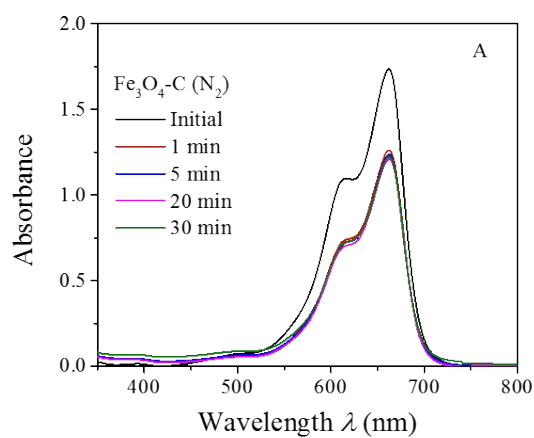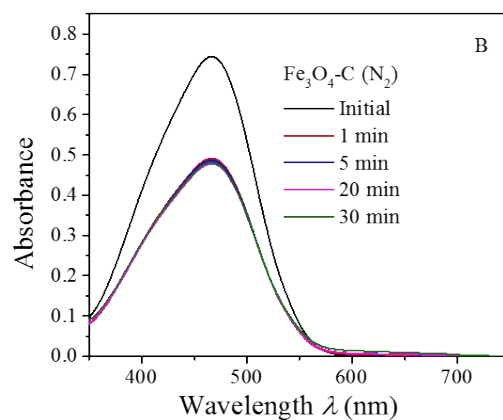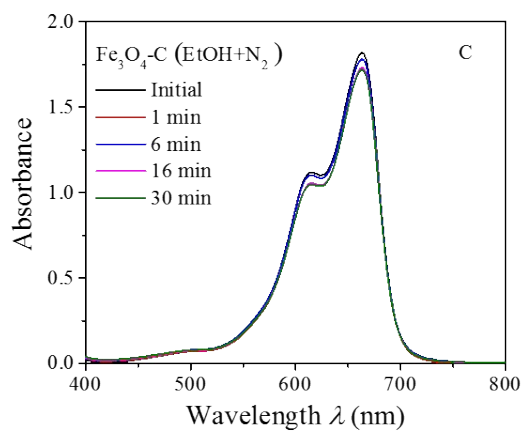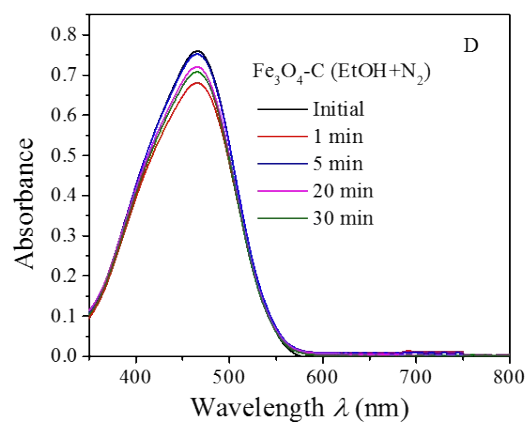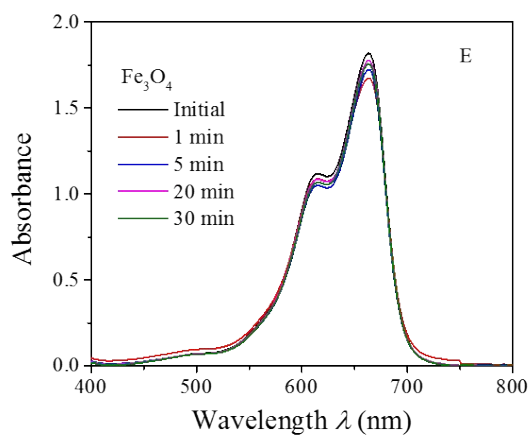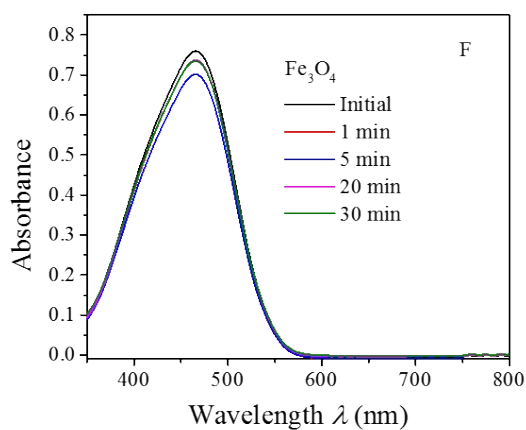

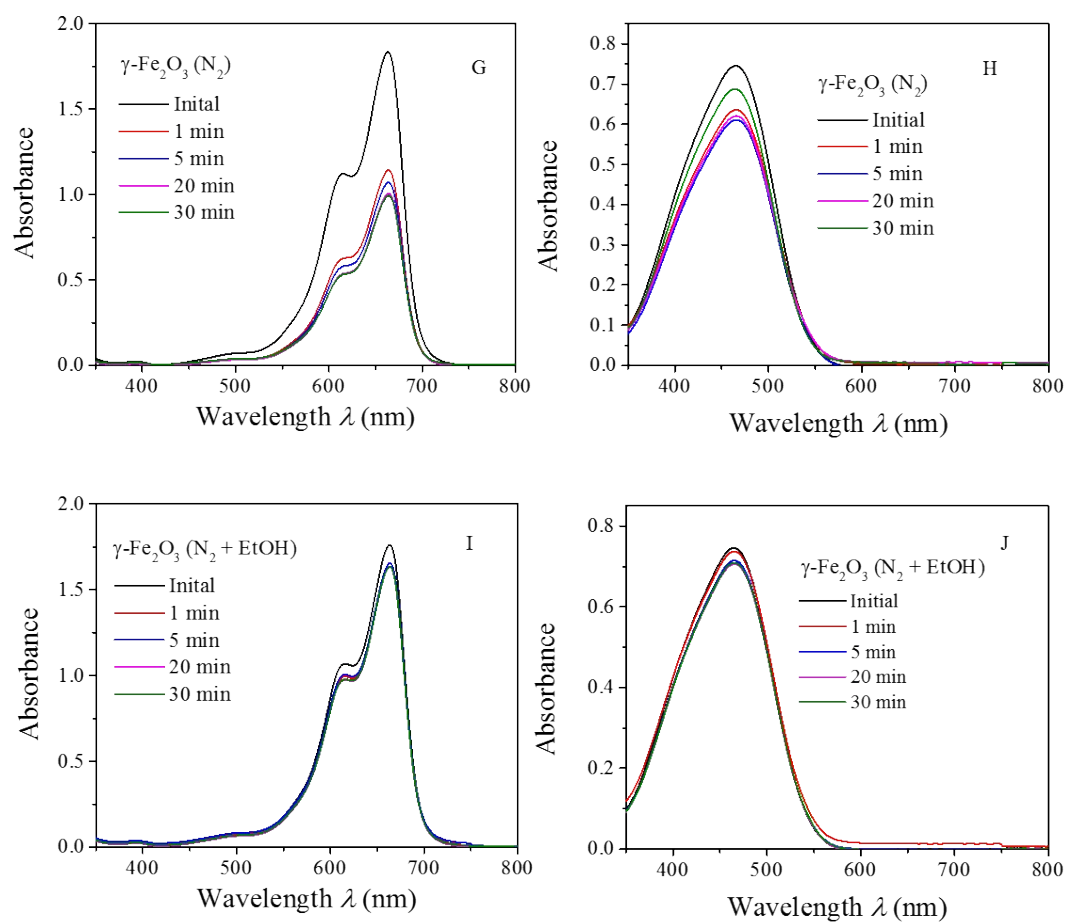

**Figure S4.** Time dependent absorbance spectra of methylene blue (MB) (left column) and methyl orange (MO) (right column) solutions with different iron oxide microrods.
